# Supplementary material for: Low temperature assembly of fullerene arrays in single-walled carbon nanotubes using supercritical fluids
Source: Royal Society of Chemistry journal article supplement (doi:10.1039/b404167d), 2004-01-01
Supplement: b404167d.doc [file b404167d.doc]

**Supporting Information**

Low temperature assembly of fullerene arrays in aingle-walled carbon nanotubes using supercritical fluids

A. N. Khlobystov, D. A. Britz, J. Wang, S. A. O’Neil, M. Poliakoff and G. A. D. Briggs

Raman spectroscopy, conventionally employed for measurements of nanotube diameters, demonstrates the broad diameter distribution of the raw nanotubes (Figure 1sup). The diameters have been calculated from the position of the radial breathing vibration mode (RBM) of SWNT according to the dNT = 248/RBM. We have analysed the RBM profile of nanotubes in a broad range of excitation wavelengths. At all wavelengths we observed only two RBM peaks, although relative peak intensities change due to different bandgaps. This indicates that there are only two major diameters present in the sample after purification. The SWNT diameter distribution was reduced to two major diameters 14.9 Å and 13.6 Å2 (Figure 1sup).


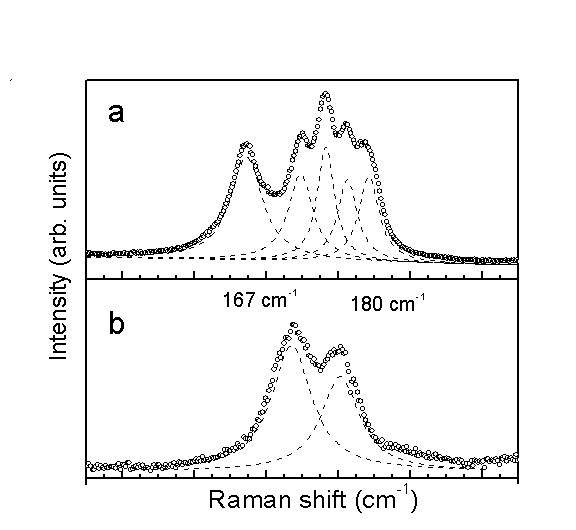


Figure 1sup. Raman spectra of (a) raw SWNTs and (b) purified SWNTs (excitation = 512nm).
